# Supplementary material for: A supramolecular switch based on three binding states of a pyrene derivate: a reversible three-state switch with only two stimuli
Source: Royal Society of Chemistry journal article supplement (doi:10.1039/c3ra41631c), 2013-01-01
Supplement: c3ra41631c.pdf [file c3ra41631c.pdf]

## Supplementary Information

### A Supramolecular Switch Based on Three Binding States of a Pyrene

#### Derivate: A Reversible Three-State Switch with Only Two Stimuli

Hao Chen,<sup>a</sup> Hui Yang,<sup>a</sup> Wenchao Xu,<sup>a</sup> and Yebang Tan<sup>\*a,b</sup>

<sup>a</sup>The Key Laboratory of Special Functional Aggregated Materials, Shandong University, Ministry of Education, Jinan 250100, People's Republic of China;

<sup>b</sup>School of Chemistry and Chemical Engineering Shandong University, Jinan 250100, People's Republic of China

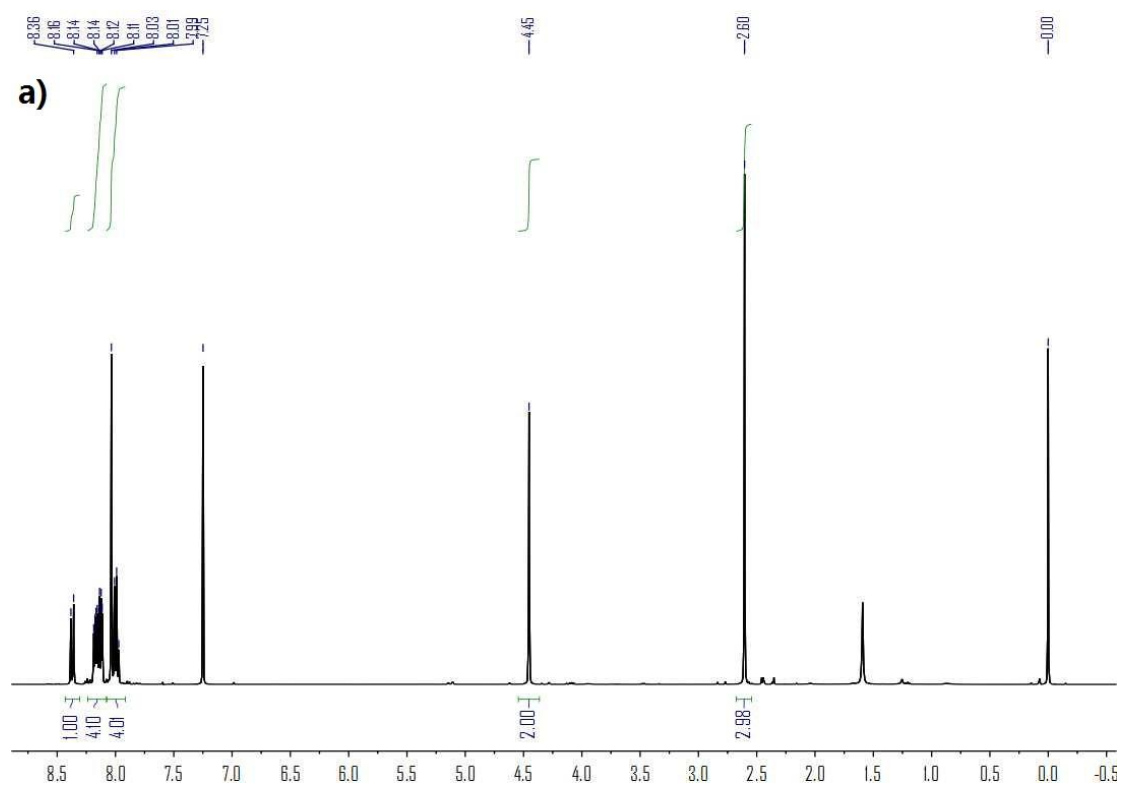

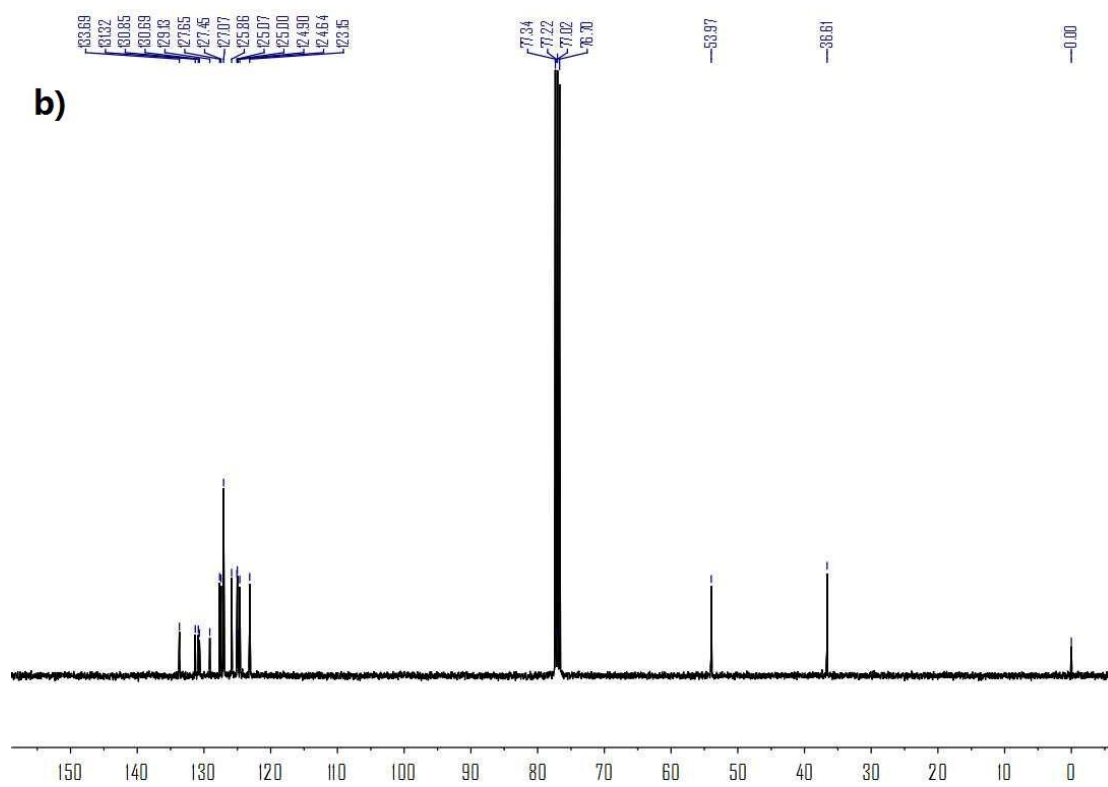

Figure S-1. a)  $^1\text{H}$  NMR spectrum of N-methyl-pyrenemethylamine (MPA) and b)  $^{13}\text{C}$  NMR spectrum of MPA in  $\text{CDCl}_3$ .

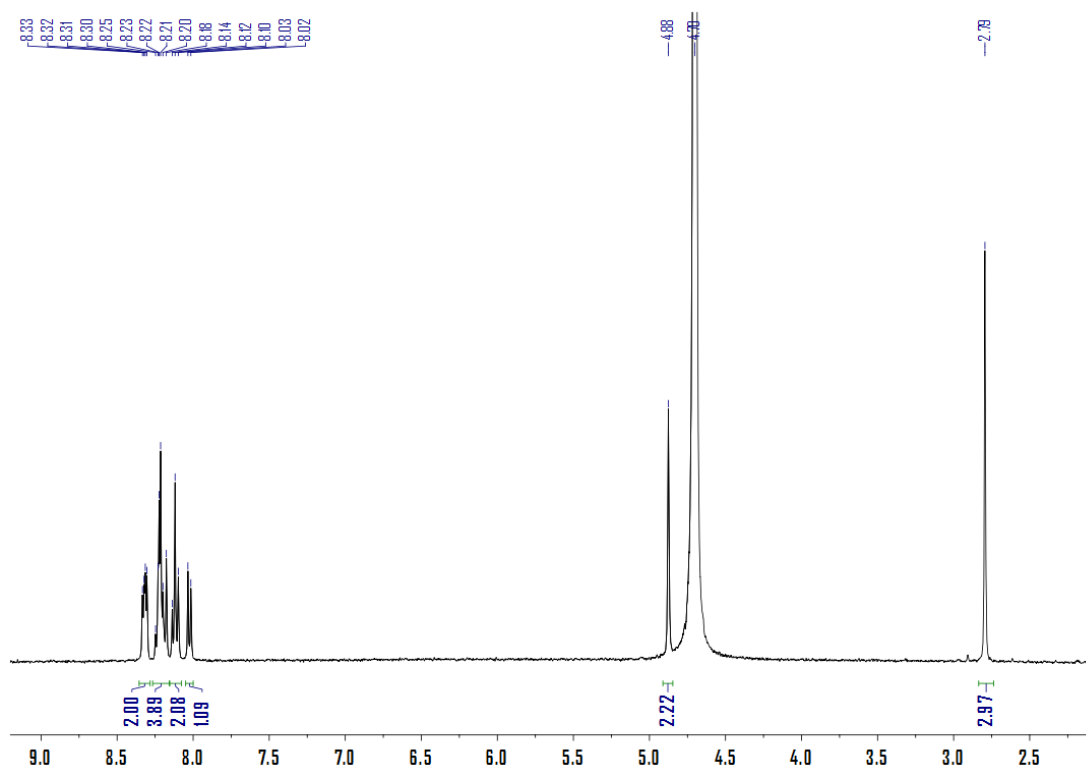

Figure S-2.  $^1\text{H}$  NMR spectrum of 1 mM N-methyl-pyrenemethylammonium ( $\text{MPA}^+$ ) in  $\text{D}_2\text{O}$ .

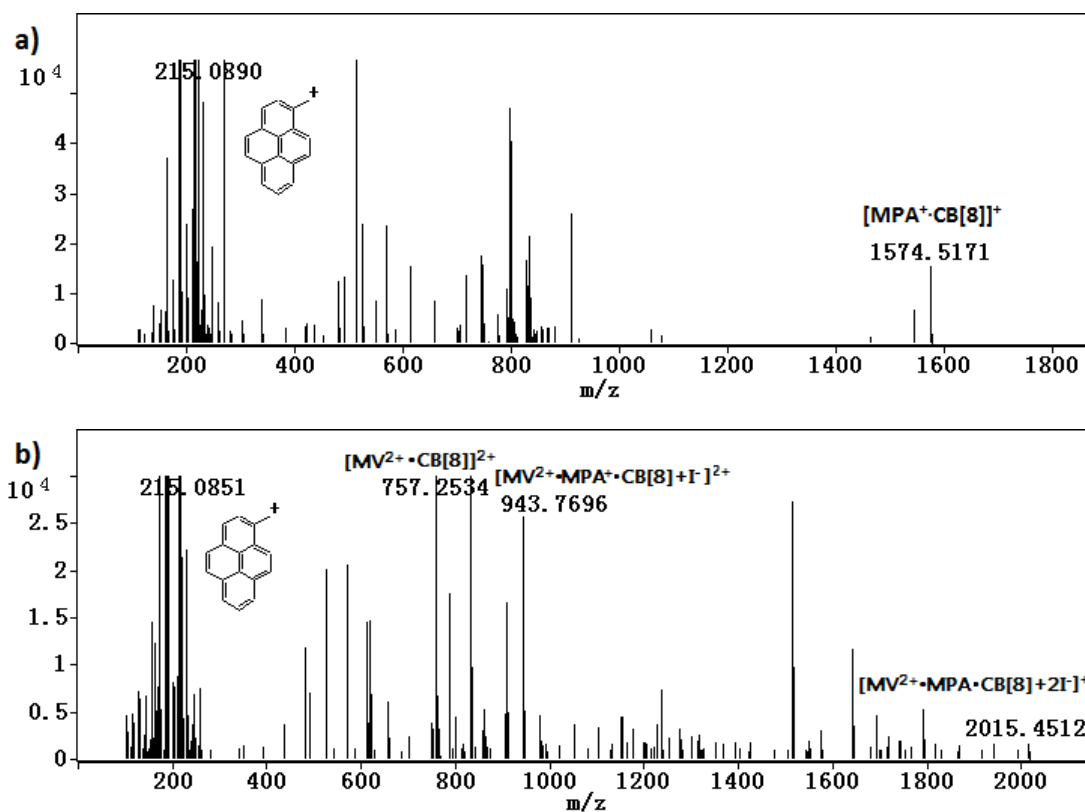

Figure S-3. Accurate mass Q-TOF spectra of a) MPA<sup>+</sup> with CB[8] (1:1 in mole), and b) MPA<sup>+</sup> with MV<sup>2+</sup> and CB[8] (1:1:1 in mole)

(MPA<sup>+</sup> is not stable under mass spectroscopy condition and most of it decomposed into methyl pyrene cation. Thus the signals of target complexes are weak and background signals are strong.)

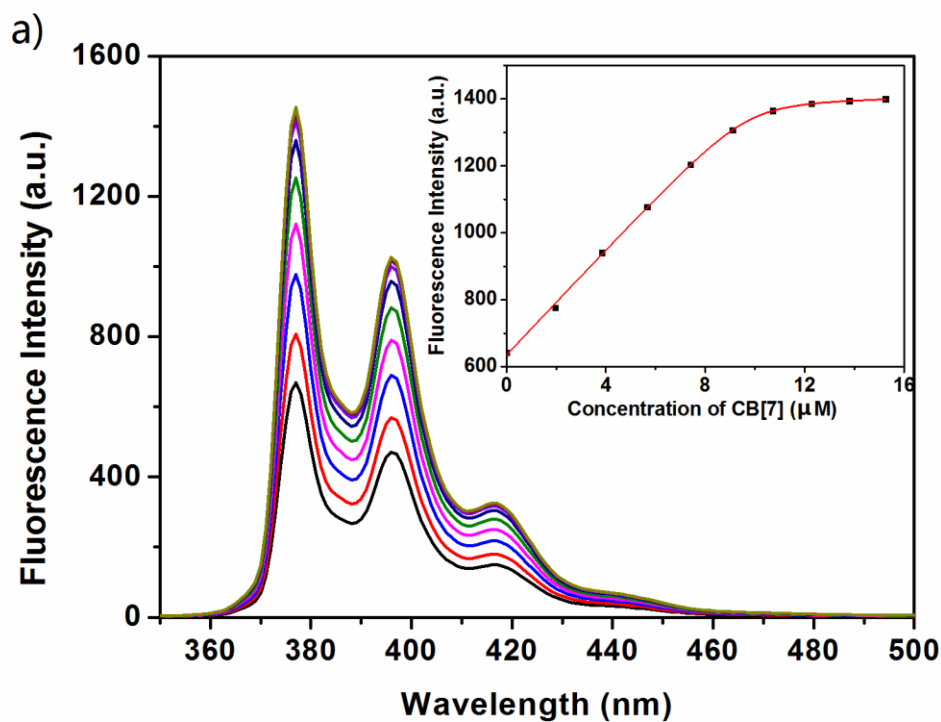

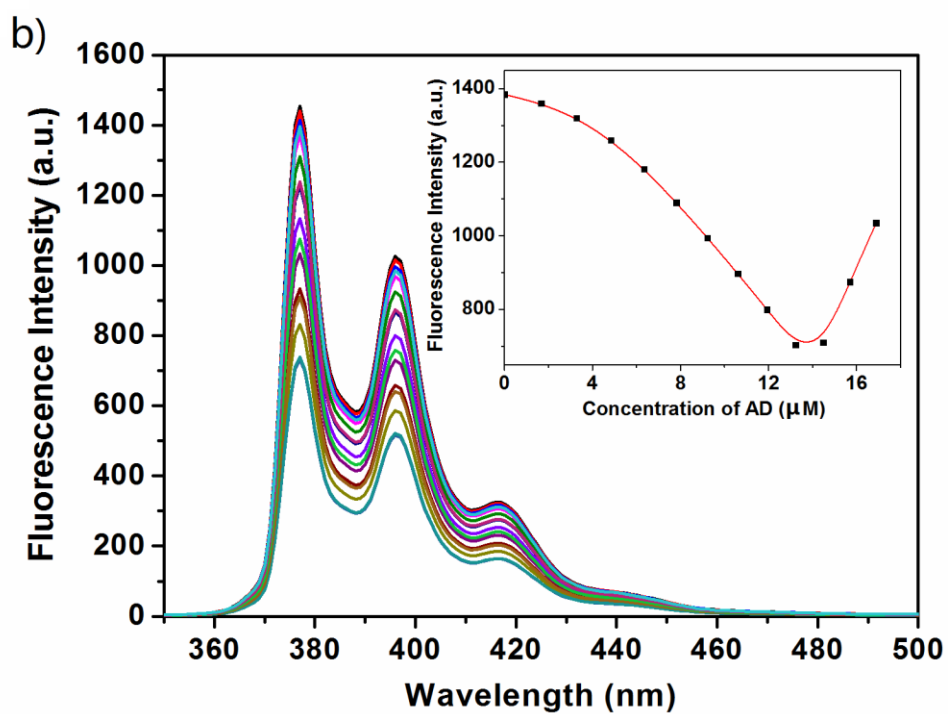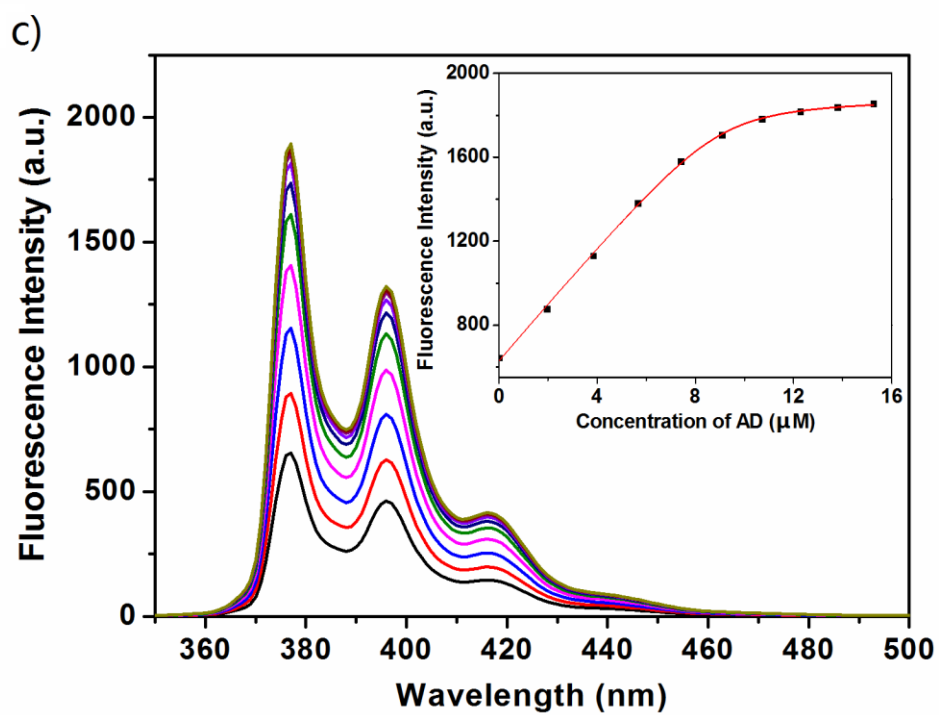

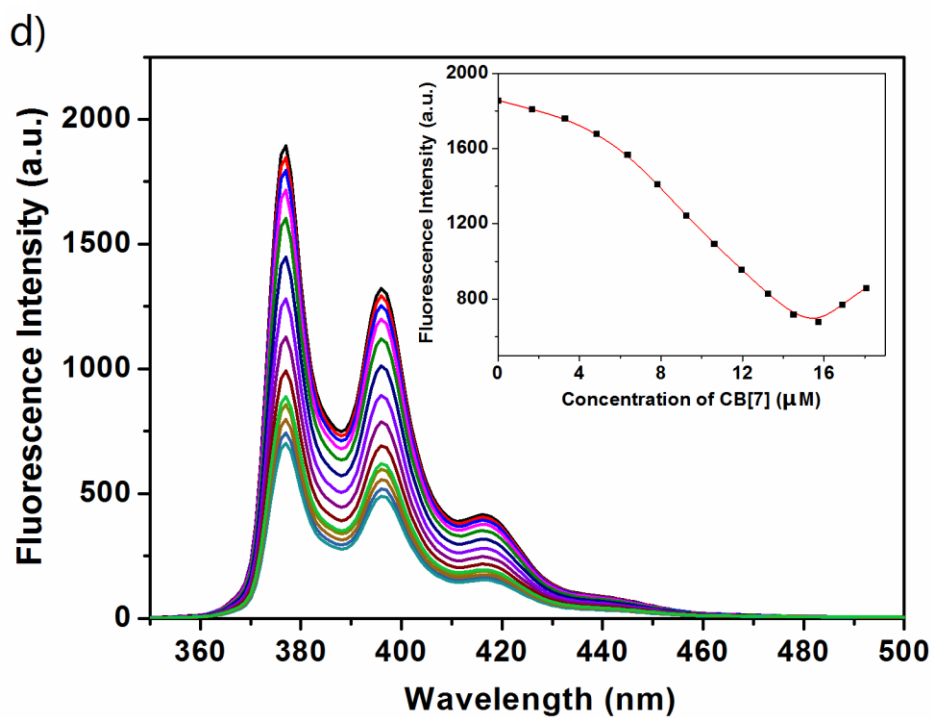

Figure S-4. Emission spectra of a) the titration of  $\text{MPA}^+ \cdot \text{MV}^{2+} \cdot \text{CB}[8]$  ( $10 \mu\text{M}$ ) with  $\text{CB}[7]$ , b) the titration of  $\text{MPA}^+ \cdot \text{MV}^{2+} \cdot \text{CB}[8]$  ( $10 \mu\text{M}$ ) and  $\text{CB}[7]$  ( $15 \mu\text{M}$ ) with  $\text{AD}$ , c) the titration of  $\text{MPA}^+ \cdot \text{MV}^{2+} \cdot \text{CB}[8]$  ( $10 \mu\text{M}$ ) with  $\text{AD}$  and d) the titration of  $\text{MPA}^+ \cdot \text{MV}^{2+} \cdot \text{CB}[8]$  ( $10 \mu\text{M}$ ) and  $\text{AD}$  ( $15 \mu\text{M}$ ) with  $\text{CB}[7]$ , inserts show the fluorescence intensity at  $376 \text{nm}$  versus the concentration of titrator.

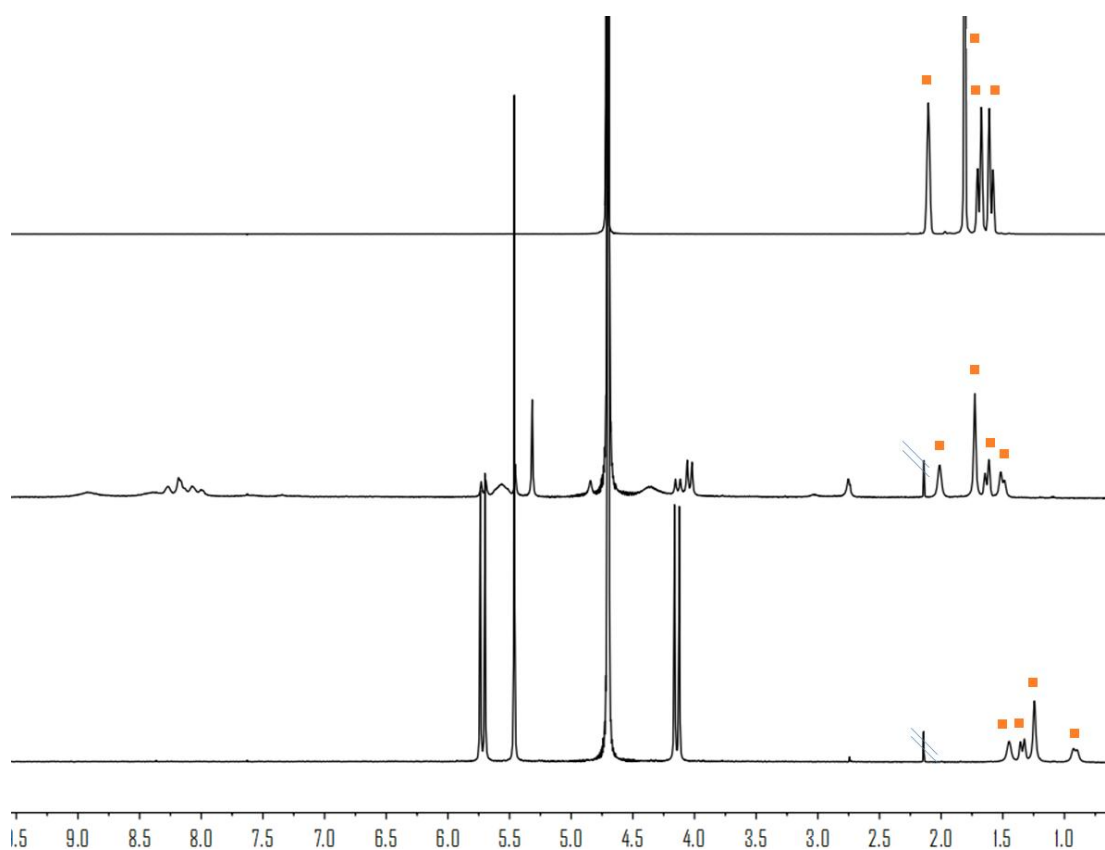

Figure S-5.  $^1\text{H}$  NMR spectra of 1 mM AD (upper), 1 mM  $\text{MPA}^+\cdot\text{MV}^{2+}\cdot\text{CB}[8]$  with 1.5 mM AD (middle) and 1 mM  $\text{AD}\cdot\text{CB}[8]$  (bottom). Peaks of AD are highlighted with orange squares.

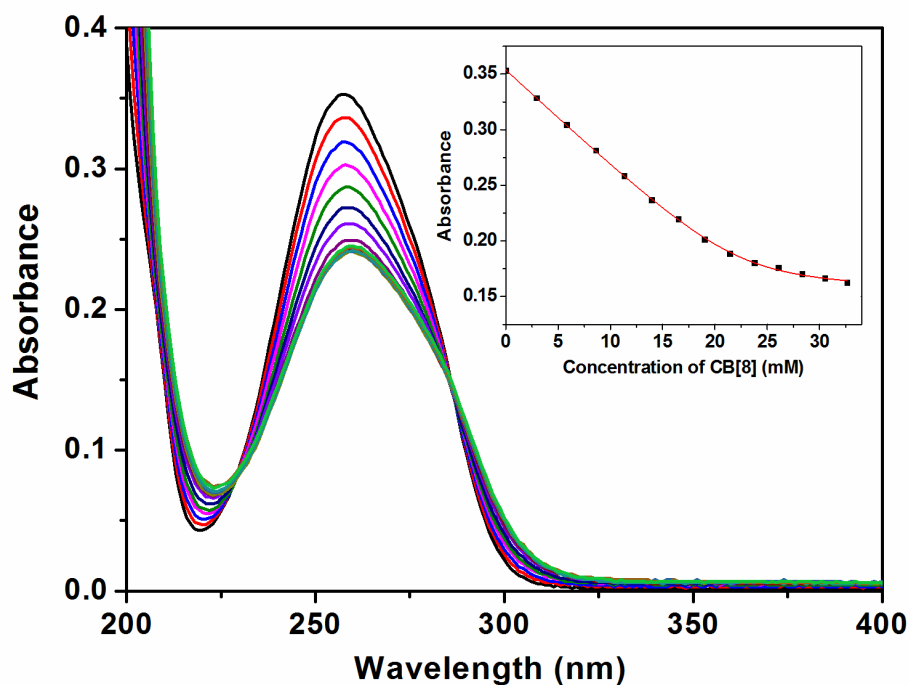

Figure S-6. UV-vis spectra of the titration of  $\text{MV}^{2+}$  (16  $\mu\text{M}$ ) with  $\text{CB}[8]$  (insert shows the absorbance at 258 nm with different amount of  $\text{CB}[8]$ , corrected for the absorbance of  $\text{CB}[8]$ )

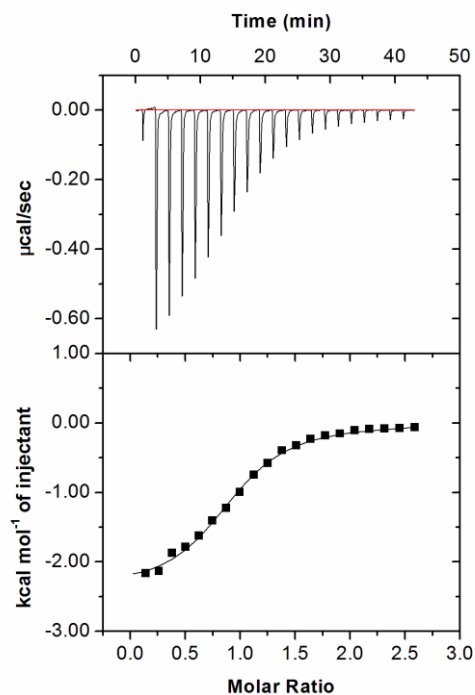

Figure S-7. ITC data for the binding of AD to CB[8] (compete with 6.4 mM  $MV^{2+}$ )

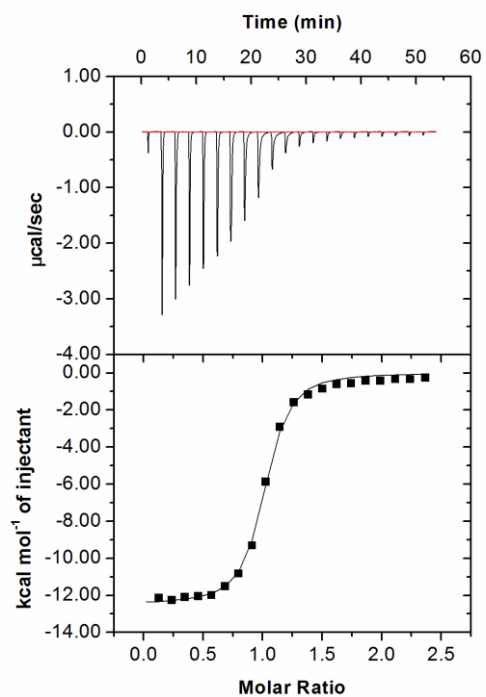

Figure S-8. ITC data for the binding of L-Phenylalanine to CB[7]

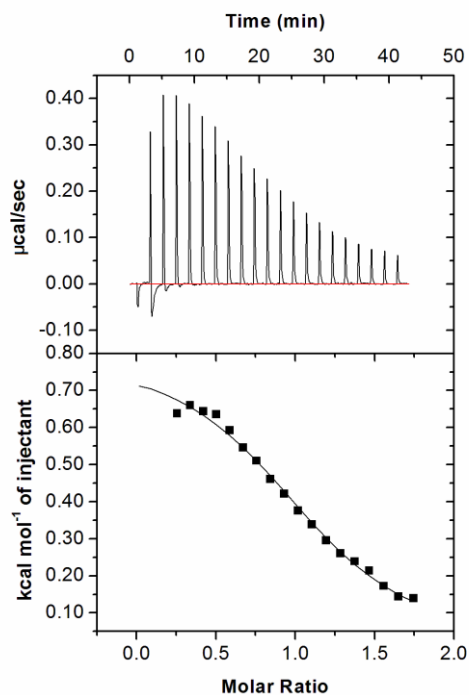

Figure S-9. ITC data for the binding of MV<sup>2+</sup> to CB[7] (compete with 10.0 mM L-Phenylalanine)

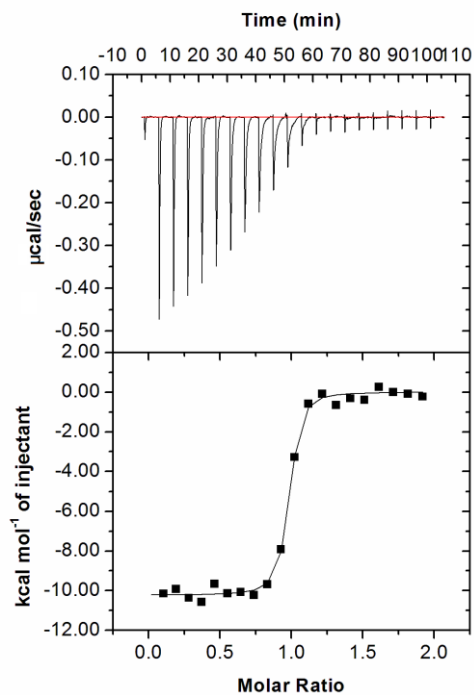

Figure S-10. ITC data for the binding of AD to CB[7] (compete with 8.0 mM MV<sup>2+</sup>)



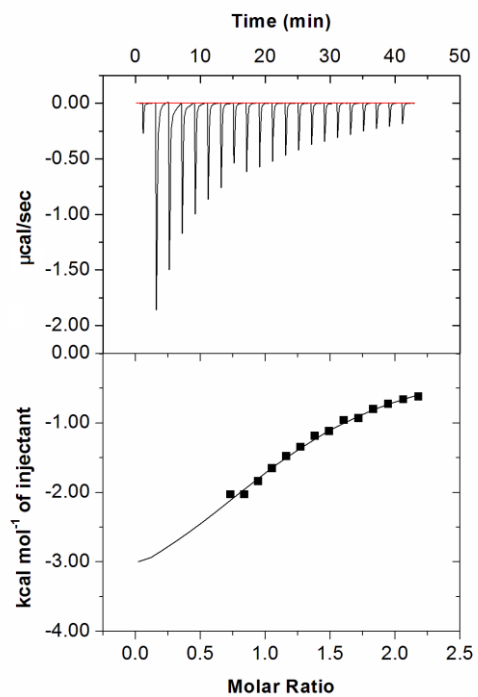

Figure S-11. ITC data for the binding of MPA<sup>+</sup> to CB[7]
